# Supplementary material for: Immunological Pathways in Sarcoidosis and Autoimmune Rheumatic Disorders—Similarities and Differences in an Italian Prospective Real-Life Preliminary Study
Source: MDPI journal article supplement (doi:10.3390/biomedicines11061532), 2023-05-25
Supplement: s1 [file s1]

## Supplementary Materials

### File S1: The gating strategy for T- and B-cell subsets performed through Kaluza Software 2.1

Gate strategy from Kaluza software for B cell panel. Lymphocytes were distinguished based on forward (FSC) versus side (SSC) scatters and additional gating was applied using CD3 versus CD19 to distinguish lymphocytes from cell debris. Three different subtypes of CD19<sup>+</sup> Bregs were divided based on CD24<sup>high</sup> CD38<sup>high</sup> (transitional B cells), CD24<sup>high</sup> CD27<sup>high</sup> (B 10 or Breg cells) and CD5<sup>+</sup>CD1d<sup>+</sup>.

Gate strategy for follicular T cells, effector and central cells from Kaluza software. Lymphocytes were distinguished based on forward (FSC) versus side (SSC) scatters and additional gating was applied to identify CD3<sup>+</sup>. A dot-plot was also assessed to identify CD4<sup>high</sup>CXCR5<sup>high</sup> (Tfh cells) and a secondary dot-plot distinguished Tfh1, 2, 17 and 17.1 according to CXCR3 and CCR6. We refer to double negative cells (CXCR3<sup>-</sup>CCR6<sup>-</sup>) as Tfh2, double positive cells (CXCR3<sup>+</sup>CCR6<sup>+</sup>) Tfh17.1, CXCR<sup>+</sup>CCR6<sup>-</sup> as Tfh1 and CXCR<sup>-</sup>CCR6<sup>+</sup> as Tfh17 cells. Th1, Th17 and Th1-like Th17 (Th17.1) cells were defined based on the markers CD45 RA and CCR6, with and without expression of CXCR3 and CCR4. For analysis, total CD4<sup>+</sup> CD45RA<sup>-</sup> were divided according to expression of CCR6. CCR6<sup>+</sup> cells were classified as CXCR3<sup>-</sup>CCR4<sup>+</sup> (Th17) and CXCR3<sup>+</sup>CCR4<sup>-</sup> (Th17.1), whereas CCR6<sup>-</sup> cells were classified as CXCR3<sup>-</sup>CCR4<sup>+</sup> (Th1) and CXCR3<sup>+</sup>CCR4<sup>-</sup> (Th2). Further dot plot was assessed to identify CD8<sup>high</sup>CXCR5<sup>high</sup> (Tfc), and a secondary dot-plot distinguished Tfc17, Tfc17.1, Tfc2, Tfc1 according to CXCR3 and CCR4. Referring to double positive cells (CXCR3<sup>+</sup>CCR4<sup>+</sup>) as Tfc17.1, double negative (CXCR3<sup>-</sup>CCR4<sup>-</sup>) as Tfc2, CXCR3<sup>+</sup>CCR4<sup>+</sup> as Tfc17, and CXCR4<sup>+</sup>CCR4<sup>-</sup> as Tfc1. Total CD8<sup>+</sup> CD45RA<sup>-</sup> were divided according to expression of CCR6. Subsequently the CCR6<sup>+</sup> cells were classified as CD45RA<sup>-</sup>CCR6<sup>+</sup> (Tc17.1) and CD45RA<sup>+</sup>CCR6<sup>-</sup> (Tc17). The total CD8<sup>-</sup>CD45RA<sup>-</sup> were classified as CCR4<sup>+</sup>CXCR3<sup>+</sup> (Tc2) and CCR4<sup>+</sup>CXCR3<sup>-</sup> (Tc1).

Gate strategy for Regulatory T cells panel from Kaluza software. Lymphocytes were distinguished based on forward (FSC) versus side (SSC) scatters and additional gating was applied using SSC versus CD3. A secondary dot-plot was subsequently assessed to distinguish CD4<sup>+</sup> and CD8<sup>+</sup> cells. On CD4<sup>+</sup> cells, four dot-plots were assessed to identify CD25<sup>bright</sup>CD127<sup>-/low</sup> (Treg), CD25<sup>high</sup>CD127<sup>high</sup> (Th effector), CD25<sup>-</sup>CD127<sup>high</sup> (Th naïve) and CD4<sup>high</sup>CD25<sup>high</sup>CXCR5<sup>high</sup> (Tfhreg). On CD8<sup>+</sup> cells, four dot-plots were assessed to identify CD25<sup>bright</sup>CD127<sup>-/low</sup> (Tcreg), CD25<sup>high</sup>CD127<sup>high</sup> (Tc effector), CD25<sup>-</sup>CD127<sup>high</sup> (Tc naïve) and CD4<sup>high</sup>CD25<sup>high</sup>CXCR5<sup>high</sup> (Tfcreg).
